# Supplementary material for: Host-Derived Artificial MicroRNA as an Alternative Method to Improve Soybean Resistance to Soybean Cyst Nematode
Source: Genes (Basel). 2016 Dec 8;7(12):122. doi: 10.3390/genes7120122 (PMC5192498; doi:10.3390/genes7120122)
Supplement: Supplementary file 1 [file genes-07-00122-s001.xlsx]

## Sheet: Sheet1
Primer sequences used in the present study
Name	Primer sequences	Note
miR-319A	TAGGCGCGCCGTCTAGACTGCAAGGCGATTAAGTTGGG	amiR-319 amplification A AscI XbaI
miR-319B	GCGAGCTCATACTAGTGGATCCCCCCATGGCGATG	amiR-319 amplification B BamHI SpeI SacI
amiR-J15-I	GATACAAAATAATTCGCAGCCGATCTCTCTTTTGTATTCC	Primers for amiR-J15 construction
amiR-J15-II	GATCGGCTGCGAATTATTTTGTATCAAAGAGAATCAATGA
amiR-J15-III	GAACGGCTGCGAATTATTTTCTATCACAGGTCGTGATATG
amiR-J15-IV	GATAGAAAATAATTCGCAGCCGTTCTACATATATATTCCT
amiR-J20-I	GATACTGCTCATAAATTGCGCTCTCTCTCTTTTGTATTCC	Primers for amiR-J20 construction
amiR-J20-II	GAGAGCGCAATTTATGAGTATCAAAGAGAATCAATGA
amiR-J20-III	GAGGGCGCAATTTATGAGCAGAATCACAGGTCGTGATATG
amiR-J20-IV	GATTCTGCTCATAAATTGCGCCCTCTACATATATATTCCT
amiR-J23-I	GATAAAAGTCGTTTAGGAAACCGTCTCTCTCTTTTGTATTCC	Primers for amiR-J23 construction
amiR-J23-II	GACGGTTTCCTAAACGACTTTTATCAAAGAGAATCAATGA
amiR-J23-III	GACGGATTCCTAAACGACTTATATCACAGGTCGTGATATG
amiR-J23-IV	GATATAAGTCGTTTAGGAATCCGTCTACATATATATTCCT
amiR-eGFP-I	GATTAGTGGTCGGCGAGCTGCACTCTCTCTTTTGTATTCC	Primers for amiR-gfp construction
amiR-eGFP-II	GAGTGCAGCTCGCCGACCACTAATCAAAGAGAATCAATGA
amiR-eGFP-III	GAATGCAGCTCGCCGACCACTATTCACAGGTCGTGATATG
amiR-eGFP-IV	GAATAGTGGTCGGCGAGCTGCATTCTACATATATATTCCT
HgACT qF	CGGCATGGGACAGAAGGA	SCN housekeeping gene as normalization in real time PCR
HgACT qR	CGTCAGAATACCACGCTTGGA
amiJ15 qF	ACGGTACAAAATAATTCGCAGCCGAAA	Stemloop PCR for amiJ15
amiJ20 qF	AGGCTACTGCTCATAAATTGCGCTCAA	Stemloop PCR for amiJ20
amiJ23 qF	AGCGTAAAAGTCGTTTAGGAAACCGAA	Stemloop PCR for amiJ23
J15 RT primer	GTCGTATCCAGTGCAGGGTCCGAGGTATTCGCACTGGATACGACTCGGCT
J20 RT Primer	GTCGTATCCAGTGCAGGGTCCGAGGTATTCGCACTGGATACGACGAGCGC
J23 RT Primer	GTCGTATCCAGTGCAGGGTCCGAGGTATTCGCACTGGATACGACCGGTTT
amiR_PR	CAGTGCAGGGTCCGAGGT
GmEl1b qF	GTTGAAAAGCCAGGGGACA	Soybean housekeeping gene as normalization in real time PCR
GmEl1b qR	TCTTACCCCTTGAGCGTGG
GmACTII qF	ATCTTGACTGAGCGTGGTTATTCC	Soybean housekeeping gene as normalization in real time PCR
GmACTII qR	GCTGGTCCTGGCTGTCTCC
Rib F	CTAAGATGCAGAACGAGGAAGG
Rib R	GAGAGCAAAAGTGGAGAAATGG
HgJ15 qF	GCGGAAAAATCCCGGACTTG
HgJ15 qR	GCAGTGAATTCGCGGTTCTC
HgJ20 qF	GAGCACATTCAGAGTCCAAG
HgJ20 qR	TGTCCACTTCCCTCAACA
HgJ23 qF	GGCCAAATACCTTGAGGAC
HgJ23 qR	AAGCCATTCTCAGCACTTT
GmUbi3_NotI_F	CACCGCGGCCGCACGGGCCCAATATAACAACGAC
GmUbi3_BamHI_R	CCAGGATCCCTGTCGAGTCAACAATCA
EGFP_BamHI_F	CCAGGATCCATGGTGAGCAAGGGCGAGGAG
EGFP_XbaI_R	TAGTCTAGATCCTCCTCCTCCCTTGTACAGCTCGTCCAT
